# Supplementary material for: Local Environmental Conditions Promote High Turnover Diversity of Benthic Deep-Sea Fungi in the Ross Sea (Antarctica)
Source: MDPI journal article supplement (doi:10.3390/jof8010065), 2022-01-08
Supplement: s1 [file s1]

## Supplementary figure

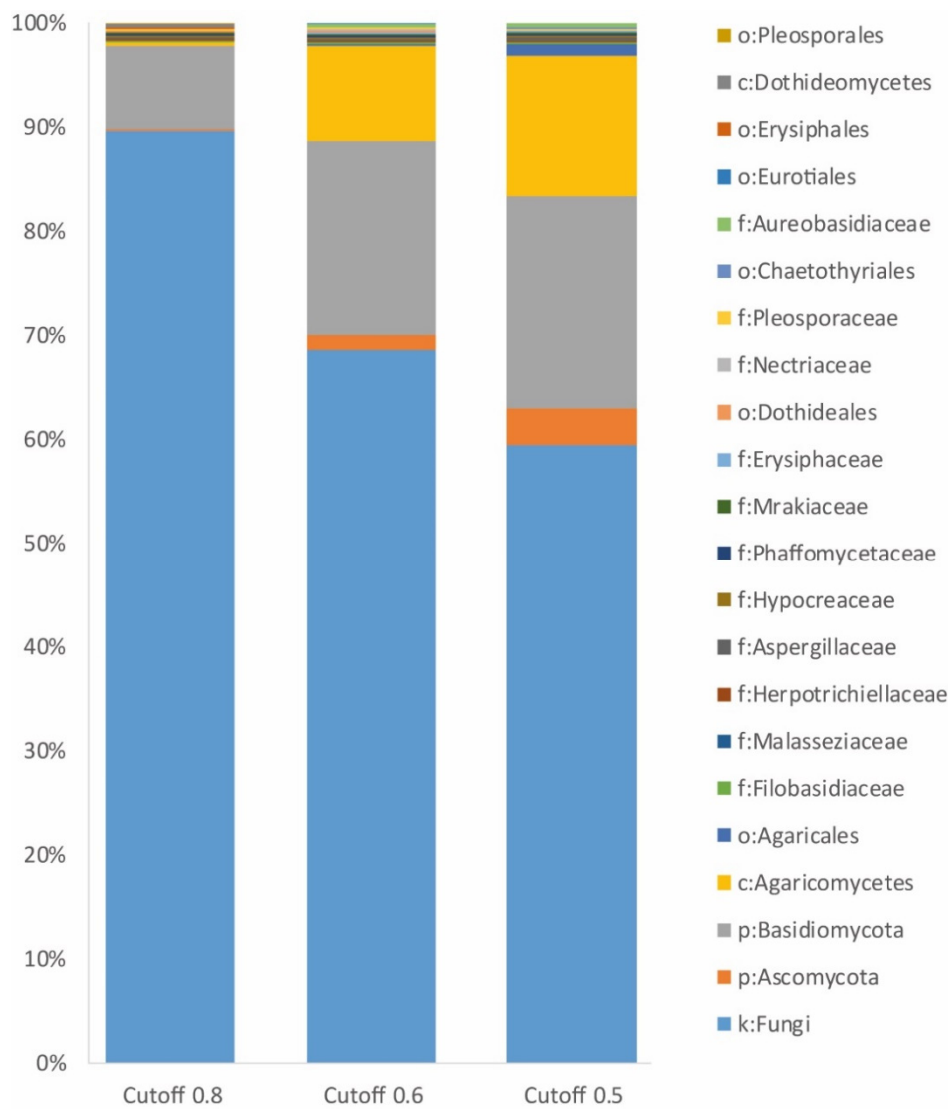

**Figure S1.** Taxonomic analysis of fungal ASVs obtained using 3 different confidence thresholds through the USEARCH SINTAX command.
